# Supplementary material for: FTL is a Novel Prognostic Predictor Associated with M2-TAMs and N2-TANs in Low-grade Glioma
Source: Research Square preprint supplement (doi:10.21203/rs.3.rs-6174184/v1), 2025-04-03
Supplement: Supplementary file 1 [file ebeafc72bec7a7a34d4f3a37.docx]

**Supplementary Figure Legends**

**Supplementary Figure S1.** Subgroup analysis of glioma patients with different expression levels of FTL. (A) Correlations between FTL expression and OS in different subgroups in glioma patients were estimated by Kaplan-Meier plotter. (B) A forest plot shows the prognostic value of FTL expression according to different subgroups in glioma patients. (C) FTL expression in different subgroups in glioma patients, including age,IDH mutation status, gender, 1p/19q non-co-deletion status, pathological grade, and progression status.

**Supplementary Figure S2.** FTL is closely related not only to macrophages and neutrophils but also to some other immune cells. Correlation of FTL expression with immune infiltration levels in LGGs (A) and GBMs (A1) using the TIMER, CIBERSORT and EPIC database.

**Supplementary Figure S3.** Prognostic analysis of FTL expression based on immune cells in LGGs. Prognostic analysis of CD4+ T cells (A), CD8+ T cells (A1), Treg (A2), DC cells (C), NK cells (C1), neutrophils (C2), all macrophages (E), M1-macrophages (E1) and M2-TAMs (E2) in LGG. Prognostic analysis of FTL expression based on CD4+ T cells (B), CD8+ T cells (B1), Treg (B2), DC cells (D), NK cells (D1), neutrophils (D2), all macrophages (F), M1-macrophages (F1) and M2-TAMs (F2) in LGG.

**Supplementary Figure S4.** Prognostic analysis of FTL expression based on immune cells in GBMs. Prognostic analysis of CD4+ T cells (A), CD8+ T cells (A1), Treg (A2), DC cells (C), NK cells (C1), neutrophils (C2), all macrophages (E), M1-macrophages (E1) and M2-TAMs (E2) in GBM. Prognostic analysis of FTL expression based on CD4+ T cells (B), CD8+ T cells (B1), Treg (B2), DC cells (D), NK cells (D1), neutrophils (D2), all macrophages (F), M1-macrophages (F1) and M2-TAMs (F2) in GBM.
